# Supplementary material
Source: PubMed Central journal article supplement (PMC4824848)

**Table S1. Summary statistics for mass spectra and protein identifications**

| gel slice #                   | 1 <sup>a</sup> | 2       | 3       | 4       | 5       | 6       | 7       | 8       | 9       | 1-9       |
|-------------------------------|----------------|---------|---------|---------|---------|---------|---------|---------|---------|-----------|
| apparent $M_r$ (kDa)          | >201           | 121-200 | 81-120  | 71-80   | 51-70   | 46-50   | 25-45   | 20-24   | 6-19    | 10->201   |
| total spectra                 | 144,558        | 165,475 | 188,699 | 184,148 | 210,706 | 177,400 | 231,982 | 119,325 | 172,220 | 1,594,513 |
| matching spectra <sup>b</sup> | 13,360         | 26,213  | 30,688  | 20,428  | 39,675  | 21,885  | 36,241  | 10,133  | 19,168  | 217,791   |
| # of protein IDs              | 39             | 103     | 142     | 100     | 240     | 155     | 303     | 121     | 246     | 654       |
| protein FDR <sup>c</sup>      | 1.7%           | 0.8%    | 0.6%    | 0.9%    | 0.4%    | 0.6%    | 0.0%    | 0.0%    | 0.4%    | 0.5%      |
| peptide FDR <sup>c</sup>      | 0.1%           | 0.1%    | 0.1%    | 0.0%    | 0.0%    | 0.0%    | 0.0%    | 0.0%    | 0.1%    | 0.0%      |

<sup>a</sup> 1–9: protein samples from gel slices 1–9; <sup>b</sup> matching spectra: number of spectra that match certain proteins in the database; <sup>c</sup> FDR: false discovery rate.

**Table S2. A list of 702 proteins identified in the gel-fractionated and ACN-treated plasma samples**

| #   | name | Seq.     | MW  | CH gel     | IH gel     | $p$ -value gel | IH/CH gel | IF/CF RNA | IH/CH RNA | IH/CH ACN | $p$ -value ACN |
|-----|------|----------|-----|------------|------------|----------------|-----------|-----------|-----------|-----------|----------------|
| 670 | 4Tox | MQFS...  | 23  | 0, 0, 0    | 0, 0, 9    | 0.4            | 5.8       | 344.4     | 77.5      | N.A.      | N.A.           |
| 298 | AMP  | MSKIF... | 11  | 19, 26, 23 | 26, 18, 22 | 0.5            | 0.9       | N.A.      | N.A.      | 0.7       | 0.3            |
| ... | ...  | ...      | ... | ...        | ...        | ...            | ...       | ...       | ...       | ...       | ...            |

#: protein identification numbers with the intracellular ones shaded green; protein name: proteins related to immunity are shaded pink; sequence: predicted signal peptide is in green font; MW: theoretical molecular mass in kDa; CH or IH gel: raw spectral counts for each identified protein in three biological replicates of the control (C) and induced (I) plasma samples separated by SDS-PAGE;  $p$ -value gel: results of the Student's t-tests conducted using normalized spectral counts (NSCs) of proteins identified after gel separation ( $p < 0.05$ : green); IH/CH gel: ratios of average NSCs of gel-separated proteins (I/C > 1.67: red; I/C < 0.60: blue); IF/CF or IH/CH RNA: relative abundances (RAs) or adjusted read numbers (ARNs) of mRNAs in fat body and hemocytes (RA or ARN > 5, red; RA or ARN < 0.2: blue; N.A.: not available) (22); IH/CH ACN: recalculated I/C ratios of NSCs of proteins identified in the ACN-treated samples (24) (I/C > 1.67: red; I/C < 0.60: blue);  $p$ -value ACN: results of the Student's t-tests conducted using NSCs of proteins identified in the supernatants after ACN treatment ( $p < 0.05$ : green).

*See the attached Excel file for the entire Table S2. A portion of it is shown above.*

**Table S3. Pearson pairwise correlation among biological replicates**

|     | CH1 | CH2  | CH3  | IH1  | IH2  | IH3  |
|-----|-----|------|------|------|------|------|
| CH1 | 1   | 0.98 | 0.99 | 0.95 | 0.95 | 0.94 |
| CH2 |     | 1    | 0.97 | 0.95 | 0.94 | 0.94 |
| CH3 |     |      | 1    | 0.94 | 0.94 | 0.93 |
| IH1 |     |      |      | 1    | 0.99 | 0.99 |
| IH2 |     |      |      |      | 1    | 0.99 |
| IH3 |     |      |      |      |      | 1    |

**Table S4. A list of 78 down-regulated proteins in gel-fractionated and ACN-treated samples\***

| #   | Name                                                | MW (kDa) | IH/CH gel | p    | IF/CF RNA | IH/CH RNA | IH/CH ACN | p    |
|-----|-----------------------------------------------------|----------|-----------|------|-----------|-----------|-----------|------|
| 395 | diapausin5                                          | 7        | N.A.      | N.A. | N.A.      | N.A.      | 0.00      | 0.00 |
| 385 | ELRRP8                                              | 64       | 0.03      | 0.02 | N.A.      | N.A.      | N.A.      | N.A. |
| 209 | HP6                                                 | 39       | 0.92      | 0.55 | 1.57      | 1.56      | 0.00      | 0.00 |
| 62  | HP8                                                 | 41       | 0.94      | 0.73 | 1.88      | 5.94      | 0.52      | 0.00 |
| 153 | HP21                                                | 46       | 0.69      | 0.21 | 0.77      | 3.09      | 0.44      | 0.02 |
| 468 | IML-9                                               | 33       | 0.13      | 0.00 | 1.94      | 1.48      | N.A.      | N.A. |
| 325 | inducible metallo-PI                                | 18       | 6.46      | 0.37 | 0.84      | N.A.      | 0.54      | 0.03 |
| 155 | peroxidase                                          | 155      | 0.56      | 0.00 | 1.02      | 0.89      | N.A.      | N.A. |
| 351 | ADP/ATP translocase                                 | 33       | 0.09      | 0.00 | 0.71      | 1.19      | N.A.      | N.A. |
| 220 | aldo-keto reductase 2E                              | 36       | 0.67      | 0.16 | N.A.      | N.A.      | 0.22      | 0.01 |
| 71  | aldo-keto reductase-2                               | 41       | 0.76      | 0.13 | 0.82      | N.A.      | 0.28      | 0.01 |
| 108 | aminoacylase                                        | 44       | 0.72      | 0.18 | 0.00      | 0.57      | 0.56      | 0.00 |
| 355 | antennal BP 7b                                      | 15       | 1.00      | 0.96 | N.A.      | N.A.      | 0.00      | 0.01 |
| 21  | apolipoprotein-like                                 | 475      | 0.48      | 0.02 | 0.71      | 0.34      | 0.00      | 0.37 |
| 318 | BCP inhibitor precursor                             | 12       | 0.36      | 0.09 | 48.33     | 1.70      | 0.60      | 0.01 |
| 103 | cathepsin L1                                        | 38       | 0.92      | 0.66 | 0.81      | 1.33      | 0.40      | 0.02 |
| 584 | chaperonin 1γ                                       | 59       | 0.18      | 0.00 | 0.57      | 1.36      | N.A.      | N.A. |
| 329 | chemosensory Pr2                                    | 13       | 1.36      | 0.43 | N.A.      | N.A.      | 0.15      | 0.01 |
| 585 | Cl- intracellular channel isoform 1                 | 30       | 0.38      | 0.04 | 0.49      | 1.06      | N.A.      | N.A. |
| 282 | collagen and Ca binding EGF domains 1               | 49       | 0.47      | 0.01 | 0.34      | 5.15      | 0.59      | 0.00 |
| 231 | collagen α-1(IV) chain-like                         | 116      | 0.17      | 0.00 | 0.67      | 0.80      | N.A.      | N.A. |
| 129 | collagen α-2(IV) chain pr.                          | 183      | 0.34      | 0.01 | 0.70      | 0.72      | 0.21      | 0.29 |
| 192 | CXE                                                 | 43       | 0.49      | 0.02 | 1.36      | N.A.      | N.A.      | N.A. |
| 194 | dipeptidase 2                                       | 46       | 0.78      | 0.00 | 2.96      | 0.24      | 0.31      | 0.02 |
| 494 | FK506-BP1, FKBP59 like                              | 53       | 0.13      | 0.05 | 0.45      | 0.94      | 0.00      | 0.37 |
| 171 | flavin-dependent monooxygenase FMO2                 | 52       | 0.68      | 0.05 | 1.19      | 1.19      | 0.00      | 0.00 |
| 238 | furin                                               | 144      | 0.85      | 0.69 | 0.51      | 1.00      | 0.00      | 0.00 |
| 589 | GST σ1                                              | 24       | 0.11      | 0.02 | 0.33      | 0.53      | N.A.      | N.A. |
| 434 | GST σ2                                              | 24       | 0.55      | 0.01 | 1.27      | 0.40      | N.A.      | N.A. |
| 560 | histone H2A-like pr. 2                              | 13       | 0.22      | 0.04 | N.A.      | 0.95      | N.A.      | N.A. |
| 527 | Hp DDB_G0277507                                     | 28       | 0.00      | 0.03 | N.A.      | N.A.      | N.A.      | N.A. |
| 266 | Hp DicuDraft_159622                                 | 13       | 1.09      | 0.58 | 1.36      | 1.35      | 0.19      | 0.02 |
| 417 | Hp KGM_05474                                        | 38       | 0.50      | 0.01 | N.A.      | N.A.      | N.A.      | N.A. |
| 245 | Hp KGM_06733                                        | 77       | 0.58      | 0.04 | 1.10      | 0.98      | 0.92      | 0.96 |
| 80  | Hp secreted                                         | 22       | 0.60      | 0.03 | 0.66      | 0.60      | 0.55      | 0.01 |
| 131 | hydroxypyruvate isomerase                           | 29       | 0.86      | 0.16 | 0.92      | 0.74      | 0.42      | 0.00 |
| 119 | isocitrate DH                                       | 46       | 0.83      | 0.06 | 0.96      | 1.16      | 0.17      | 0.00 |
| 336 | JH esterase                                         | 65       | 0.03      | 0.00 | 1.17      | 0.25      | N.A.      | N.A. |
| 340 | larval cuticle pr. 16/17                            | 12       | 0.98      | 0.96 | 0.08      | N.A.      | 0.04      | 0.00 |
| 531 | mating type pr. MAT1-1-1                            | 10       | 0.00      | 0.00 | 0.03      | 0.34      | 0.00      | 0.00 |
| 230 | Msex010104-RA                                       | 26       | 0.55      | 0.04 | 3.06      | 5.83      | 0.52      | 0.01 |
| 142 | OBP1                                                | 20       | 0.73      | 0.28 | 0.29      | N.A.      | 0.48      | 0.03 |
| 48  | Ommochrome BP                                       | 31       | 0.81      | 0.04 | 0.94      | N.A.      | 0.43      | 0.02 |
| 99  | peroxisomal N1-acetyl-spermine/spermidine oxidase-1 | 53       | 0.65      | 0.01 | N.A.      | N.A.      | 0.25      | 0.01 |
| 227 | peroxisomal N1-acetyl-spermine/spermidine oxidase-2 | 53       | 0.64      | 0.04 | N.A.      | N.A.      | 0.00      | 0.00 |
| 660 | pr. disulfide isomerase A6                          | 46       | 0.00      | 0.00 | 1.41      | 0.75      | N.A.      | N.A. |
| 566 | proteasome subunit α3                               | 28       | 0.00      | 0.02 | 0.38      | 1.44      | N.A.      | N.A. |
| 446 | rpL4                                                | 49       | 0.21      | 0.04 | 1.02      | 0.96      | N.A.      | N.A. |
| 606 | rpL5                                                | 34       | 0.07      | 0.01 | 0.91      | 0.80      | N.A.      | N.A. |
| 521 | rpL7                                                | 31       | 0.29      | 0.04 | 0.00      | 0.10      | N.A.      | N.A. |
| 604 | rpL7A                                               | 30       | 0.11      | 0.00 | 1.13      | 1.01      | N.A.      | N.A. |
| 512 | rpL13A                                              | 23       | 0.22      | 0.05 | 0.68      | 1.16      | N.A.      | N.A. |
| 598 | rpL15                                               | 24       | 0.00      | 0.01 | 1.09      | 0.91      | N.A.      | N.A. |
| 631 | rpL22                                               | 17       | 0.18      | 0.04 | 0.87      | 1.05      | N.A.      | N.A. |
| 477 | rpS3 40S                                            | 27       | 0.11      | 0.01 | 0.84      | 1.11      | N.A.      | N.A. |
| 550 | rpS3A                                               | 30       | 0.11      | 0.01 | 1.44      | 1.10      | 0.00      | 0.37 |
| 433 | rpS4                                                | 30       | 0.35      | 0.03 | 1.07      | 0.93      | N.A.      | N.A. |
| 353 | rpS9                                                | 23       | 0.37      | 0.01 | 1.65      | 1.47      | 0.00      | 0.37 |
| 593 | rpS13                                               | 17       | 0.00      | 0.00 | 1.67      | 1.17      | N.A.      | N.A. |
| 575 | rpS15A                                              | 15       | 0.10      | 0.03 | 1.74      | 1.25      | N.A.      | N.A. |
| 536 | rpS16                                               | 17       | 0.00      | 0.02 | 0.75      | 1.04      | N.A.      | N.A. |
| 422 | rpS18                                               | 18       | 0.25      | 0.04 | 1.53      | 1.08      | N.A.      | N.A. |
| 537 | rpS20                                               | 14       | 0.18      | 0.03 | 1.23      | 1.25      | N.A.      | N.A. |
| 661 | rpS27                                               | 9        | 0.00      | 0.00 | 1.44      | 1.09      | N.A.      | N.A. |
| 83  | secreted acidic Cys-rich pr.                        | 38       | 0.32      | 0.01 | 0.66      | 0.72      | 0.20      | 0.00 |
| 75  | tolloid-like pr. 2                                  | 158      | 1.12      | 0.46 | 2.07      | 0.59      | 0.45      | 0.01 |
| 406 | transitional ER ATPase TER94                        | 89       | 0.36      | 0.05 | 1.25      | 1.68      | N.A.      | N.A. |
| 159 | transl. EF 1α                                       | 50       | 0.57      | 0.02 | 0.94      | 1.05      | N.A.      | N.A. |
| 565 | transl. EF 1β'                                      | 24       | 0.00      | 0.03 | 1.00      | 0.89      | N.A.      | N.A. |
| 449 | uncharacterized inducible pr. A                     | 7        | 1.70      | 0.59 | N.A.      | N.A.      | 0.22      | 0.01 |
| 149 | venom acid phosphatase                              | 45       | 0.48      | 0.00 | 0.79      | 2.92      | 0.13      | 0.00 |

|     |                                                      |     |      |      |      |      |      |      |
|-----|------------------------------------------------------|-----|------|------|------|------|------|------|
| 441 | vitellogenic carboxypeptidase                        | 55  | 0.00 | 0.01 | 0.61 | 0.97 | N.A. | N.A. |
| 53  | $\alpha$ -amylase 3                                  | 58  | 0.66 | 0.14 | 0.77 | 5.83 | 0.41 | 0.00 |
| 240 | $\beta$ -1,3-glucanase                               | 42  | 0.81 | 0.32 | 1.27 | 3.56 | 0.40 | 0.02 |
| 156 | $\beta$ A mannosidase, lysosomal                     | 102 | 0.72 | 0.01 | 0.71 | 1.02 | 0.05 | 0.01 |
| 87  | $\beta$ -N-acetylglucosaminidase 1                   | 70  | 0.73 | 0.03 | 1.36 | 0.89 | 0.43 | 0.00 |
| 113 | $\gamma$ -glutamyl cyclotransferase-like venom pr. 1 | 23  | 0.71 | 0.01 | 1.12 | N.A. | 0.54 | 0.02 |
| 179 | $\gamma$ -glutamyl hydrolase                         | 38  | 0.57 | 0.00 | N.A. | N.A. | 0.23 | 0.07 |

\* See Table 1 footnotes

**Table S5. Distribution of USCs of the 654 proteins identified in the gel slices \***

| name   | Mr (kDa) | slice # | 1       | 2       | 3      | 4     | 5     | 6     | 7     | 8     | 9     | $\Sigma$ USC | I or U |
|--------|----------|---------|---------|---------|--------|-------|-------|-------|-------|-------|-------|--------------|--------|
|        |          | Mr      | 500–200 | 200–120 | 120–80 | 80–70 | 70–50 | 50–45 | 45–25 | 25–20 | 20–10 |              |        |
| proPO1 | 79       | Ctrl    | 0       | 10.3    | 49.5   | 171.5 | 121.8 | 27.5  | 43.2  | 0     | 0.7   | 424.5        | I      |
|        |          | Ind     | 0       | 18      | 41.9   | 162.7 | 77.4  | 16.7  | 30.4  | 0     | 0.6   | 347.7        |        |
| ...    | ...      | ...     | ...     | ...     | ...    | ...   | ...   | ...   | ...   | ...   | ...   |              |        |

\* Sums of USCs for *highly abundant* ( $\Sigma$ USC: 6000–500), *abundant* (500–150), *moderate* (150–50), *low* (50–15), and *rare* (15–0) proteins are listed in cells corresponding to the gel slices; The protein names are highlighted yellow, grey, orange, green, and white accordingly. If USC = 0, the cell is shaded in light blue; If USC > 0, they are shaded in a color gradient from white to red. The USC spreading patterns are shown in the column of  $M_r$  in different colors: blue for  $M_r$  down shifted 2 or more gel slices; light blue for consistent  $M_r$  (-1 to +1 slice); green for  $M_r$  up shifted 2 slices; yellow for  $M_r$  up shifted 3 or more gel slices. In the column  $\Sigma$ USC, up- and down-regulated proteins are shaded orange and green, respectively. I for immunity-related; U for immunity-unrelated.

*See the attached Excel file for Table S5. A small portion of it is shown above*

**Table S6. Detailed information for the 702 identified proteins**

| #   | name     | # of distinct peptides |     |     |     |     |     | % coverage |     |     |     |     |     | identification probability % |     |     |     |     |     |
|-----|----------|------------------------|-----|-----|-----|-----|-----|------------|-----|-----|-----|-----|-----|------------------------------|-----|-----|-----|-----|-----|
|     |          | CH1                    | CH2 | CH3 | IH1 | IH2 | IH3 | CH1        | CH2 | CH3 | IH1 | IH2 | IH3 | CH1                          | CH2 | CH3 | IH1 | IH2 | IH3 |
| 670 | 4Tox_SV3 | 0                      | 0   | 0   | 0   | 0   | 2   | 0          | 0   | 0   | 0   | 0   | 11  | 0                            | 0   | 0   | 0   | 0   | 100 |
| 298 | MGD2b    | 3                      | 4   | 3   | 4   | 3   | 3   | 21         | 35  | 21  | 35  | 21  | 21  | 100                          | 100 | 100 | 100 | 100 | 100 |
| 14  | apolipo3 | 28                     | 25  | 25  | 24  | 24  | 24  | 68         | 66  | 66  | 66  | 65  | 66  | 100                          | 100 | 100 | 100 | 100 | 100 |
| 369 | attacin1 | 0                      | 0   | 0   | 3   | 0   | 3   | 0          | 0   | 0   | 78  | 0   | 83  | 0                            | 0   | 0   | 100 | 0   | 100 |
| 117 | attacin2 | 0                      | 0   | 0   | 15  | 16  | 14  | 0          | 0   | 0   | 79  | 80  | 80  | 0                            | 0   | 0   | 100 | 100 | 100 |
| ... | ...      | ...                    | ... | ... | ... | ... | ... | ...        | ... | ... | ... | ... | ... | ...                          | ... | ... | ... | ... | ... |

*See the attached Excel file for Table S6. A small portion of it is shown above*

## Figure legends

- Fig. S1. Correlation of the mRNA and protein abundances (A) and their changes (B) for the ACN-treated samples.** See Fig. 3 for the definitions of x- and y-axes.
- Fig. S2. Relationships of  $\Sigma$ USCs of proteins and numbers of the gel slices they were identified.** Open circles (blue), control samples; open diamonds (red), induced samples. Proteins with similar  $\Sigma$ USCs were slightly shifted to reduce overlap.

Fig. S1

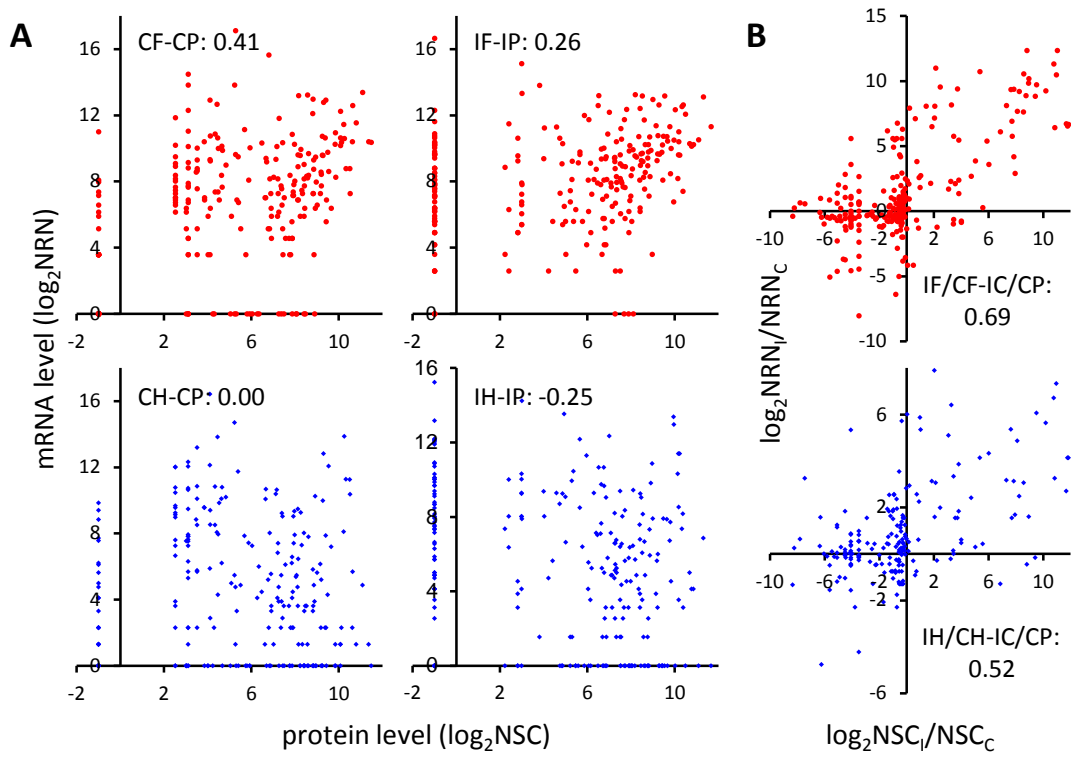

Fig. S2

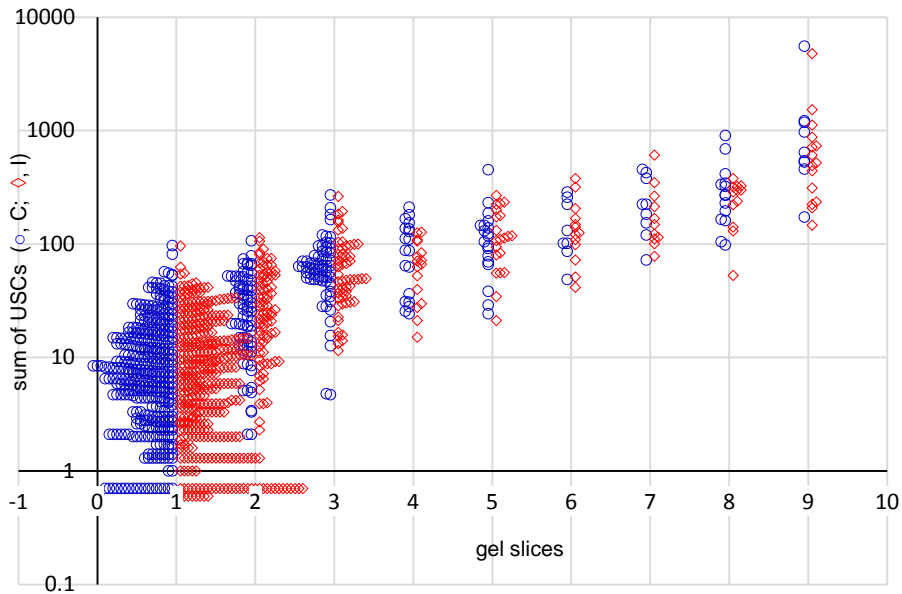

Supplement: 10.1074_M115.054296_mcp.M115.054296-1.pdf [file 10.1074_M115.054296_mcp.M115.054296-1.pdf]
